# Supplementary material
Source: MDPI journal article supplement (https://www.mdpi.com/2304-6740/10/9/133)
Supplement: s1 [file s1]

# Crystallographic and theoretical study of osme bonds in nitrido-osmium(VI) complexes

Rosa M. Gomila and Antonio Frontera \*

Universitat de les Illes Balears, Crta de Valldemossa km 7.5, 07122 Palma de Mallorca, Spain

\* Correspondence: toni.frontera@uib.es

## Cartesian Coordinates

1

|    |            |            |            |
|----|------------|------------|------------|
| Os | 0.0000000  | 0.0000000  | -3.7754260 |
| C1 | -0.0000000 | -2.2452362 | -4.3533015 |
| C1 | 2.2349415  | 0.0000000  | -4.3803476 |
| C1 | -0.0000000 | 2.2452362  | -4.3533015 |
| C1 | -2.2349415 | 0.0000000  | -4.3803476 |
| N  | 0.0000000  | 0.0000000  | -2.1581439 |
| N  | 0.0000000  | 0.0000000  | 1.3727567  |
| C  | 0.0000000  | -1.2310377 | 0.5264419  |
| C  | 1.2148022  | 0.0000000  | 2.2285074  |
| C  | 0.0000000  | 1.2310377  | 0.5264419  |
| C  | -1.2148022 | 0.0000000  | 2.2285074  |
| H  | -0.8811042 | -1.2280703 | -0.1105126 |
| H  | 0.0000000  | -2.0966657 | 1.1875079  |
| H  | 2.0940015  | 0.0000000  | 1.5869358  |
| H  | 1.2115095  | -0.8922871 | 2.8528439  |
| H  | 0.8811042  | 1.2280703  | -0.1105126 |
| H  | 0.0000000  | 2.0966657  | 1.1875079  |
| H  | -2.0940015 | 0.0000000  | 1.5869358  |
| H  | -1.2115095 | 0.8922871  | 2.8528439  |
| H  | -1.2115095 | -0.8922871 | 2.8528439  |
| H  | 0.8811042  | -1.2280703 | -0.1105126 |
| H  | 1.2115095  | 0.8922871  | 2.8528439  |
| H  | -0.8811042 | 1.2280703  | -0.1105126 |

**2**

|    |            |            |            |
|----|------------|------------|------------|
| Os | 0.0000000  | 0.0000000  | -2.9252262 |
| Cl | 0.0000000  | -2.3071800 | -3.3416070 |
| Cl | 2.3039392  | 0.0000000  | -3.3517208 |
| Cl | 0.0000000  | 2.3071800  | -3.3416070 |
| Cl | -2.3039392 | 0.0000000  | -3.3517208 |
| N  | 0.0000000  | 0.0000000  | -1.3093211 |
| N  | 0.0000000  | 0.0000000  | 2.1896681  |
| C  | 0.0000000  | -1.2336676 | 1.3463086  |
| C  | 1.2145830  | 0.0000000  | 3.0448437  |
| C  | 0.0000000  | 1.2336676  | 1.3463086  |
| C  | -1.2145830 | 0.0000000  | 3.0448437  |
| H  | -0.8804114 | -1.2328447 | 0.7086714  |
| H  | 0.0000000  | -2.0960328 | 2.0119192  |
| H  | 2.0933326  | 0.0000000  | 2.4026393  |
| H  | 1.2115159  | -0.8924476 | 3.6690031  |
| H  | 0.8804114  | 1.2328447  | 0.7086714  |
| H  | 0.0000000  | 2.0960328  | 2.0119192  |
| H  | -2.0933326 | 0.0000000  | 2.4026393  |
| H  | -1.2115159 | 0.8924476  | 3.6690031  |
| H  | -1.2115159 | -0.8924476 | 3.6690031  |
| H  | 0.8804114  | -1.2328447 | 0.7086714  |
| H  | 1.2115159  | 0.8924476  | 3.6690031  |
| H  | -0.8804114 | 1.2328447  | 0.7086714  |
| N  | 0.0000000  | 0.0000000  | -5.4477537 |
| C  | 0.0000000  | 0.0000000  | -6.5877245 |
| H  | 0.0000000  | 0.0000000  | -7.6551066 |

**3**

|    |            |            |            |
|----|------------|------------|------------|
| Os | -0.0000000 | 0.0000000  | -3.2320606 |
| Cl | 0.0000000  | -2.2945716 | -3.6924565 |
| Cl | 2.2919952  | 0.0000000  | -3.7010879 |
| Cl | 0.0000000  | 2.2945716  | -3.6924565 |
| Cl | -2.2919952 | 0.0000000  | -3.7010879 |

|   |            |            |            |
|---|------------|------------|------------|
| N | -0.0000000 | 0.0000000  | -1.6147389 |
| N | 0.0000000  | 0.0000000  | 1.9038056  |
| C | -0.0000000 | -1.2325373 | 1.0594753  |
| C | 1.2160689  | 0.0000000  | 2.7575080  |
| C | -0.0000000 | 1.2325373  | 1.0594753  |
| C | -1.2160689 | 0.0000000  | 2.7575080  |
| H | -0.8811132 | -1.2311397 | 0.4227978  |
| H | -0.0000000 | -2.0963538 | 1.7230603  |
| H | 2.0935435  | 0.0000000  | 2.1134310  |
| H | 1.2148752  | -0.8926496 | 3.3812981  |
| H | 0.8811132  | 1.2311397  | 0.4227978  |
| H | 0.0000000  | 2.0963538  | 1.7230603  |
| H | -2.0935435 | 0.0000000  | 2.1134310  |
| H | -1.2148752 | 0.8926496  | 3.3812981  |
| H | -1.2148752 | -0.8926496 | 3.3812981  |
| H | 0.8811132  | -1.2311397 | 0.4227978  |
| H | 1.2148752  | 0.8926496  | 3.3812981  |
| H | -0.8811132 | 1.2311397  | 0.4227978  |
| C | 0.0000000  | 0.0000000  | -5.8358180 |
| O | -0.0000000 | 0.0000000  | -6.9574322 |

#### 4

|    |            |            |            |
|----|------------|------------|------------|
| Os | 0.0000000  | 0.0000000  | -1.2312646 |
| Cl | 0.0000000  | -2.3022429 | -1.6580740 |
| Cl | 2.3490873  | -0.0000000 | -1.4797496 |
| Cl | 0.0000000  | 2.3022429  | -1.6580740 |
| Cl | -2.3490873 | 0.0000000  | -1.4797496 |
| N  | 0.0000000  | 0.0000000  | 0.3877369  |
| N  | 0.0000000  | 0.0000000  | 3.8918478  |
| C  | 0.0000000  | -1.2336716 | 3.0485353  |
| C  | 1.2139402  | -0.0000000 | 4.7478820  |
| C  | 0.0000000  | 1.2336716  | 3.0485353  |
| C  | -1.2139402 | 0.0000000  | 4.7478820  |
| H  | -0.8804813 | -1.2330012 | 2.4109023  |
| H  | 0.0000000  | -2.0958885 | 3.7143029  |

|   |            |            |            |
|---|------------|------------|------------|
| H | 2.0935199  | 0.0000000  | 4.1068132  |
| H | 1.2099312  | -0.8923301 | 5.3722072  |
| H | 0.8804813  | 1.2330012  | 2.4109023  |
| H | 0.0000000  | 2.0958885  | 3.7143029  |
| H | -2.0935199 | 0.0000000  | 4.1068132  |
| H | -1.2099312 | 0.8923301  | 5.3722072  |
| H | -1.2099312 | -0.8923301 | 5.3722072  |
| H | 0.8804813  | -1.2330012 | 2.4109023  |
| H | 1.2099312  | 0.8923301  | 5.3722072  |
| H | -0.8804813 | 1.2330012  | 2.4109023  |
| N | 0.0000000  | 0.0000000  | -3.7862092 |
| C | -1.1416310 | 0.0000000  | -4.4730517 |
| C | 1.1416310  | -0.0000000 | -4.4730517 |
| C | -1.1879228 | -0.0000000 | -5.8567546 |
| H | -2.0464824 | 0.0000000  | -3.8793602 |
| C | 1.1879228  | 0.0000000  | -5.8567546 |
| H | 2.0464824  | 0.0000000  | -3.8793602 |
| C | 0.0000000  | 0.0000000  | -6.5667892 |
| H | -2.1474433 | -0.0000000 | -6.3588928 |
| H | 2.1474433  | 0.0000000  | -6.3588928 |
| H | 0.0000000  | 0.0000000  | -7.6510611 |

## 5

|    |            |            |            |
|----|------------|------------|------------|
| Os | 0.0000000  | 0.0000000  | -3.4188900 |
| Cl | 0.0000000  | -2.4065342 | -3.4978711 |
| Cl | 2.4038490  | 0.0000000  | -3.5123532 |
| Cl | 0.0000000  | 2.4065342  | -3.4978711 |
| Cl | -2.4038490 | -0.0000000 | -3.5123532 |
| N  | 0.0000000  | 0.0000000  | -1.7903523 |
| N  | 0.0000000  | 0.0000000  | 1.4598032  |
| C  | 0.0000000  | -1.2572163 | 0.6408271  |
| C  | 1.2139870  | -0.0000000 | 2.3107899  |
| C  | 0.0000000  | 1.2572163  | 0.6408271  |
| C  | -1.2139870 | 0.0000000  | 2.3107899  |
| H  | -0.8750910 | -1.2761482 | -0.0030785 |

|    |            |            |            |
|----|------------|------------|------------|
| H  | 0.0000000  | -2.0914208 | 1.3444088  |
| H  | 2.0878783  | 0.0000000  | 1.6618435  |
| H  | 1.2153140  | -0.8932777 | 2.9344289  |
| H  | 0.8750910  | 1.2761482  | -0.0030785 |
| H  | 0.0000000  | 2.0914208  | 1.3444088  |
| H  | -2.0878783 | 0.0000000  | 1.6618435  |
| H  | -1.2153140 | 0.8932777  | 2.9344289  |
| H  | -1.2153140 | -0.8932777 | 2.9344289  |
| H  | 0.8750910  | -1.2761482 | -0.0030785 |
| H  | 1.2153140  | 0.8932777  | 2.9344289  |
| H  | -0.8750910 | 1.2761482  | -0.0030785 |
| Cl | 0.0000000  | 0.0000000  | -5.8712528 |

## 6

|    |            |            |            |
|----|------------|------------|------------|
| Os | 0.0000000  | 0.0000000  | -2.8794703 |
| Cl | -0.0000000 | -2.3860359 | -3.0424170 |
| Cl | 2.3824934  | 0.0000000  | -3.0581748 |
| Cl | -0.0000000 | 2.3860359  | -3.0424170 |
| Cl | -2.3824934 | -0.0000000 | -3.0581748 |
| N  | 0.0000000  | 0.0000000  | -1.2578001 |
| N  | 0.0000000  | 0.0000000  | 2.0386126  |
| C  | 0.0000000  | -1.2517162 | 1.2139266  |
| C  | 1.2138491  | 0.0000000  | 2.8905372  |
| C  | 0.0000000  | 1.2517162  | 1.2139266  |
| C  | -1.2138491 | 0.0000000  | 2.8905372  |
| H  | -0.8758744 | -1.2653949 | 0.5709008  |
| H  | 0.0000000  | -2.0927208 | 1.9084385  |
| H  | 2.0888362  | 0.0000000  | 2.2431948  |
| H  | 1.2141138  | -0.8931344 | 3.5142666  |
| H  | 0.8758744  | 1.2653949  | 0.5709008  |
| H  | 0.0000000  | 2.0927208  | 1.9084385  |
| H  | -2.0888362 | 0.0000000  | 2.2431948  |
| H  | -1.2141138 | 0.8931344  | 3.5142666  |
| H  | -1.2141138 | -0.8931344 | 3.5142666  |
| H  | 0.8758744  | -1.2653949 | 0.5709008  |

|   |            |           |            |
|---|------------|-----------|------------|
| H | 1.2141138  | 0.8931344 | 3.5142666  |
| H | -0.8758744 | 1.2653949 | 0.5709008  |
| C | 0.0000000  | 0.0000000 | -6.2038605 |
| O | 0.0000000  | 0.0000000 | -4.9747475 |
| N | 0.0000000  | 0.0000000 | -7.3744139 |
